# Supplementary material
Source: Springer Nature journal article supplement (https://www.springermedizin.de/resource/supplementary/13012_2009_169_MOESM6_ESM.pdf/9629390)

Proxy = Patient report

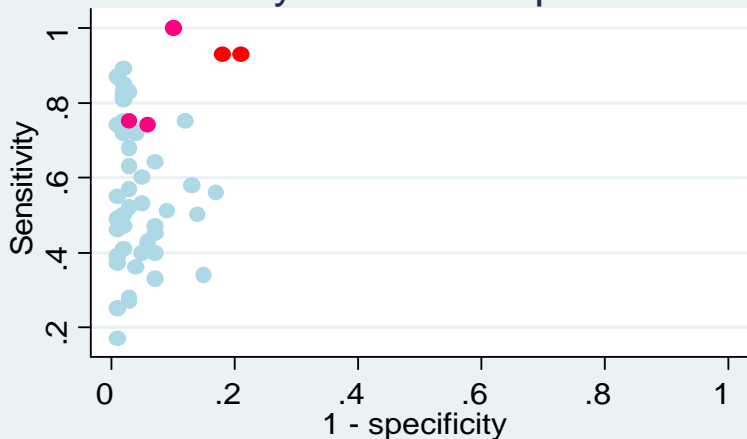

Proxy = Medical record

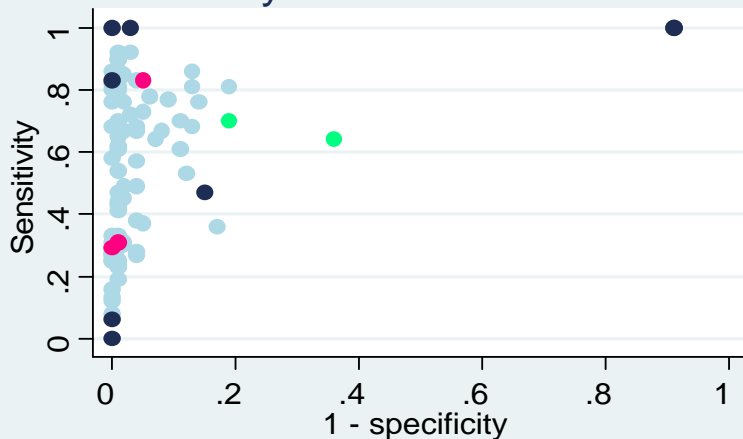

Proxy = Self-report

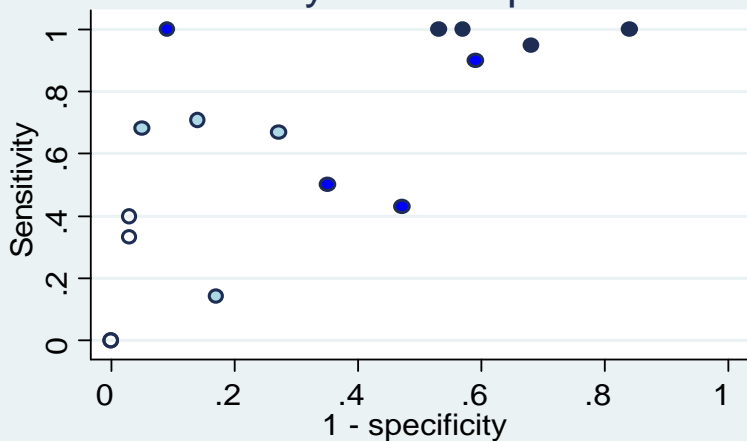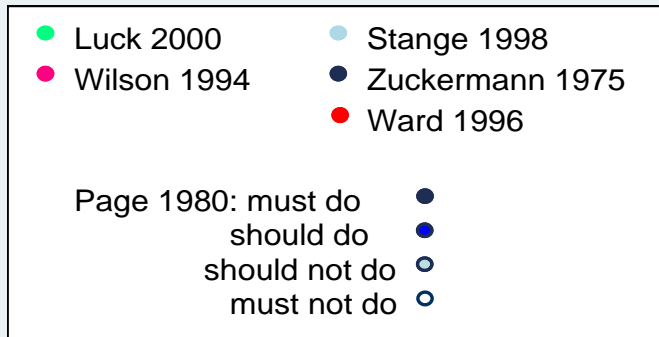

Supplement: MOESM6 [file 9629390]
